# Supplementary material for: Synthesis of Carbon Encapsulated Mono‐ and Multi‐Iron Nanoparticles
Source: Hindawi journal article supplement (doi:10.1155/2015/450183), 2015-01-01
Supplement: f1 [file 450183.f1.doc]

**Supporting Information**


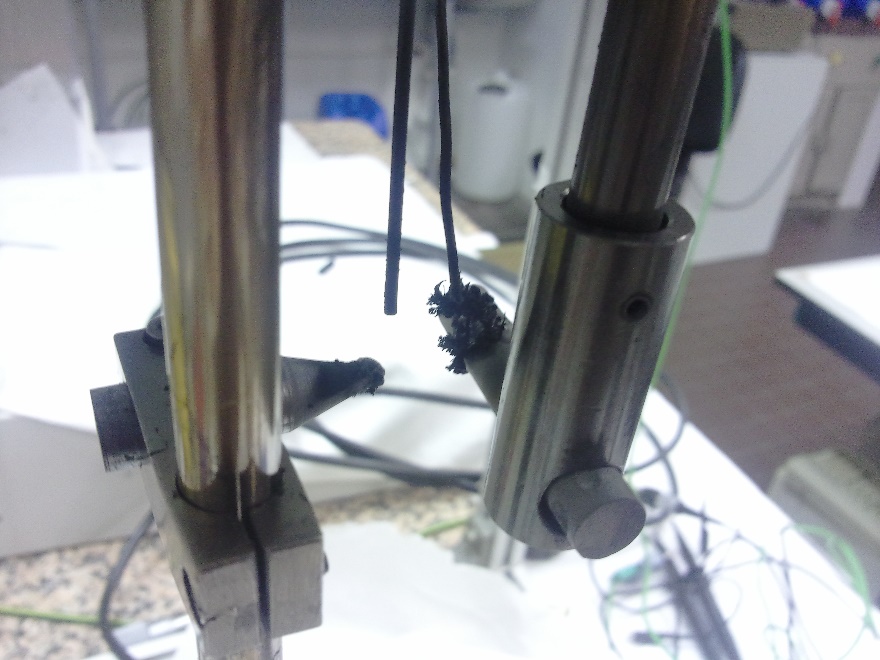


Figure S1. Deformation of carbon electrodes; the nanoparticles deposited on the carbon surface due to the high temperature of nitrogen plasma.


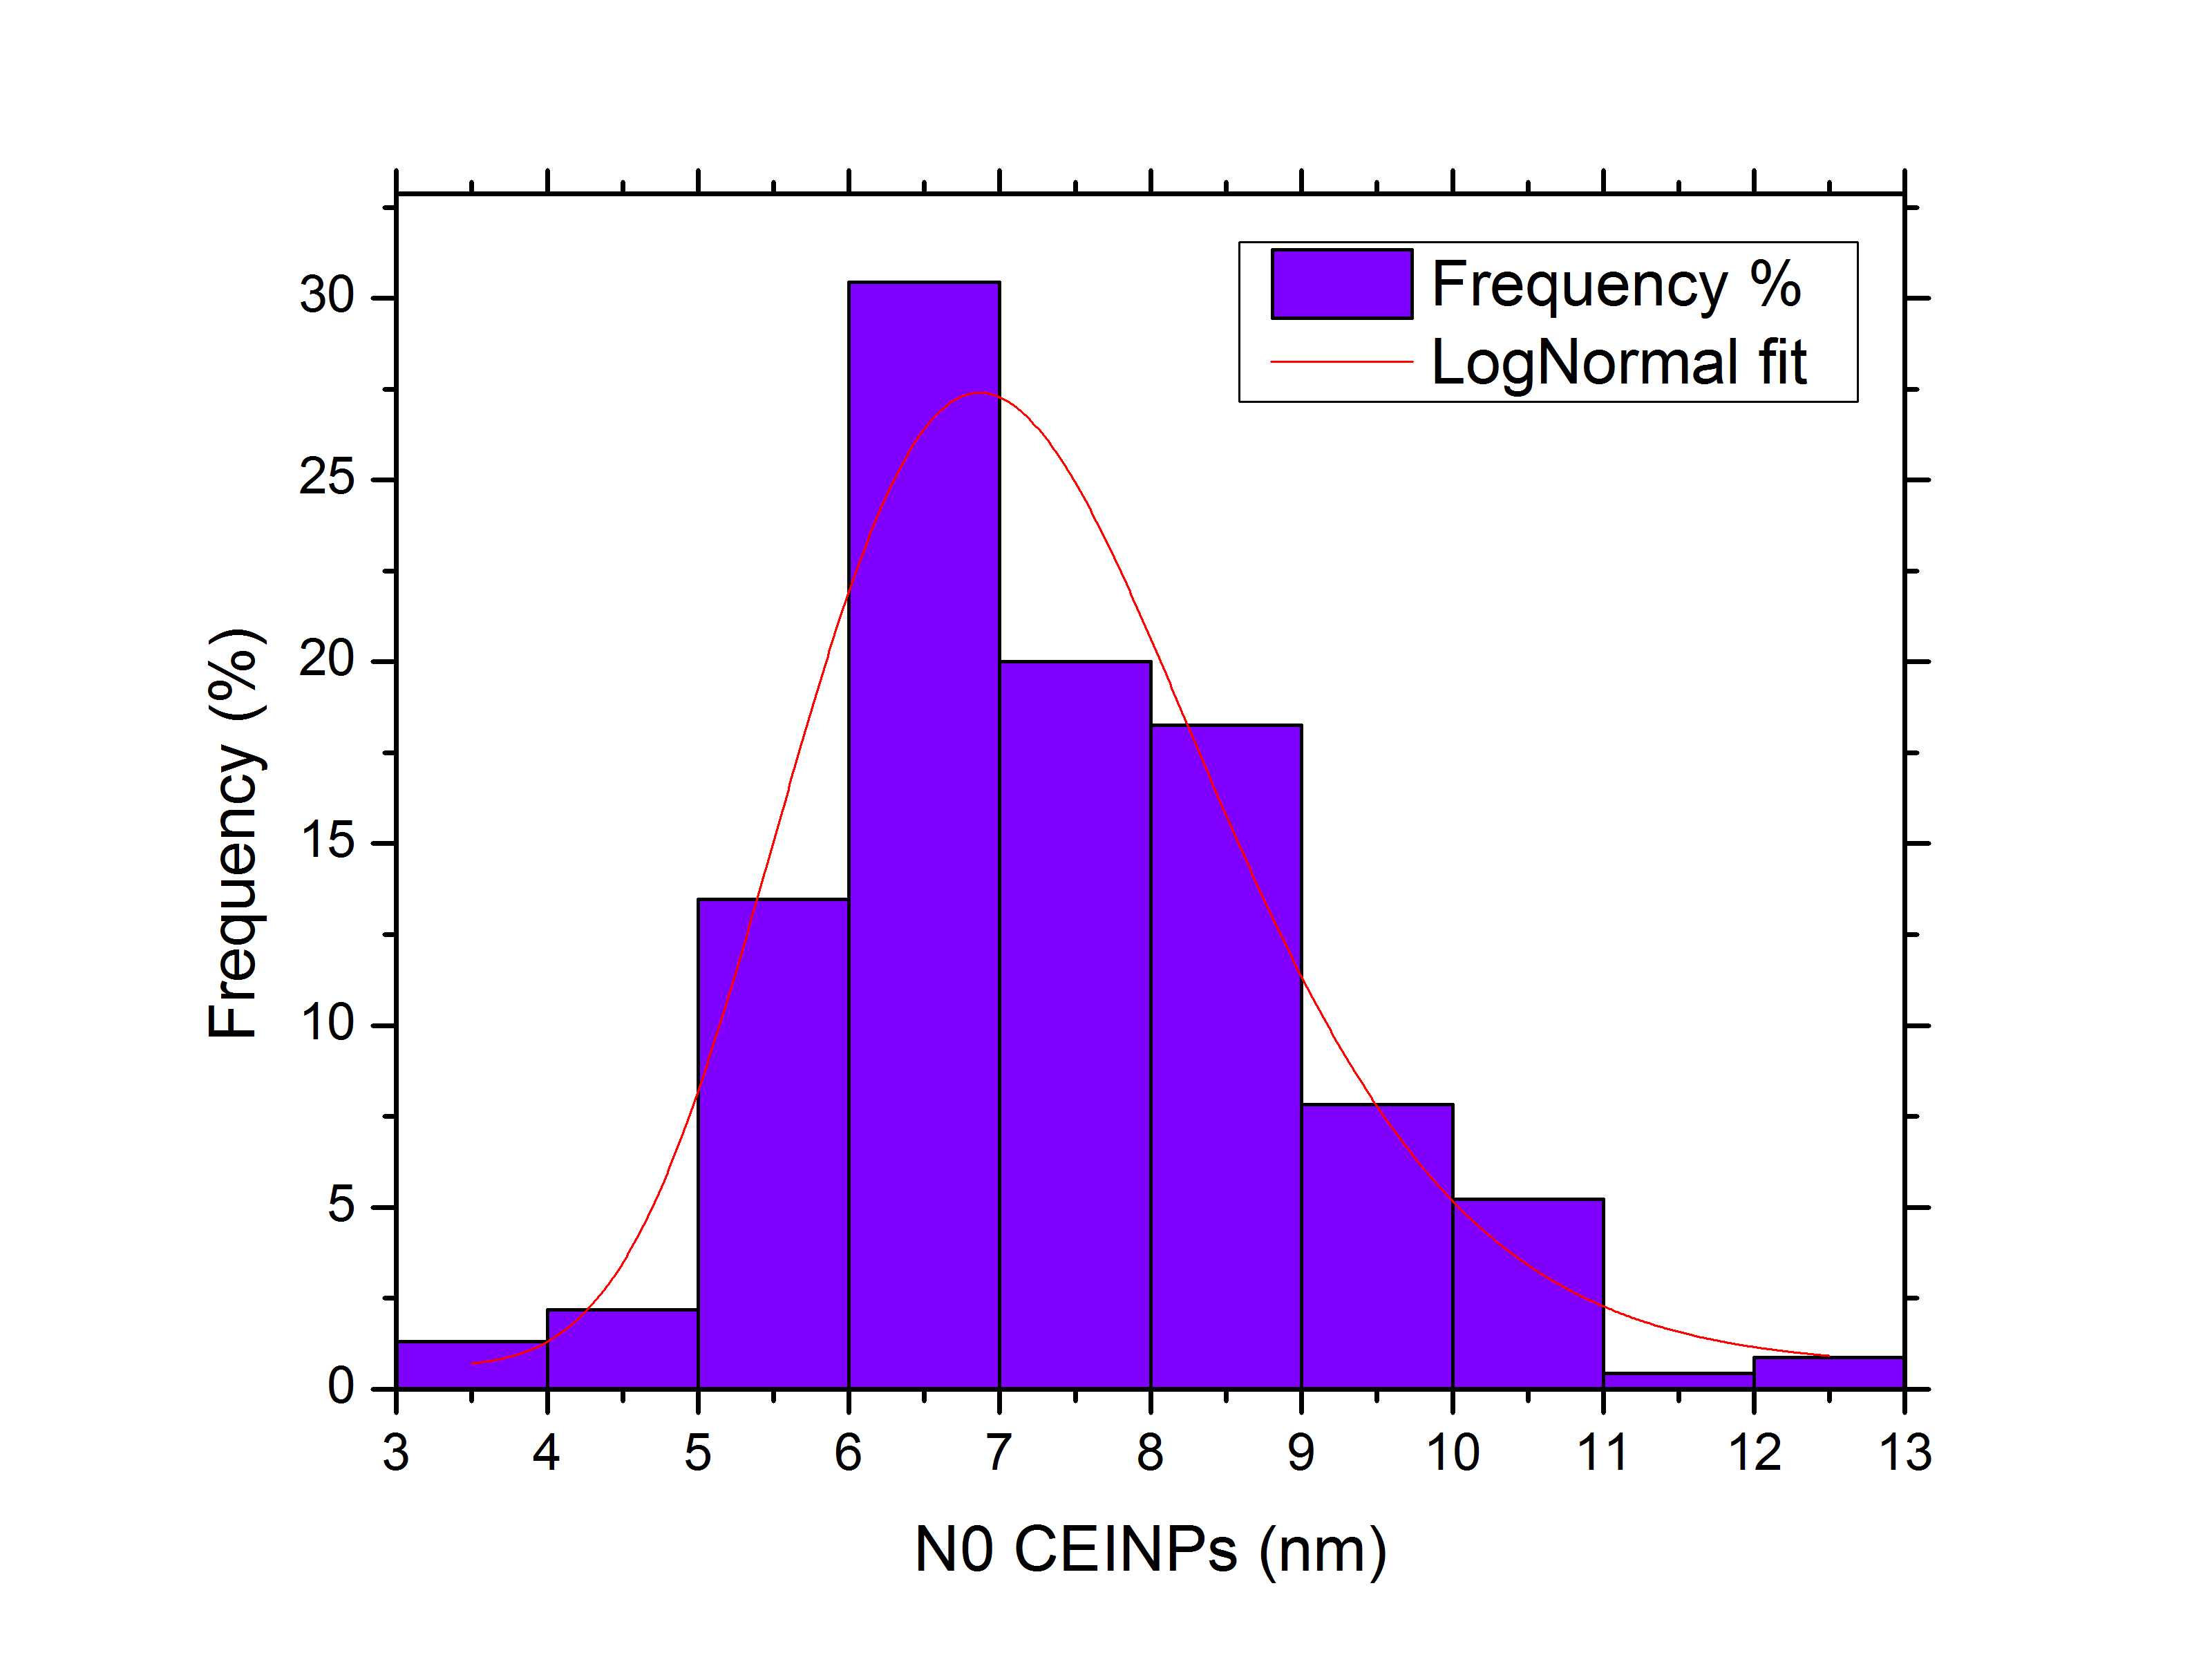
(a)


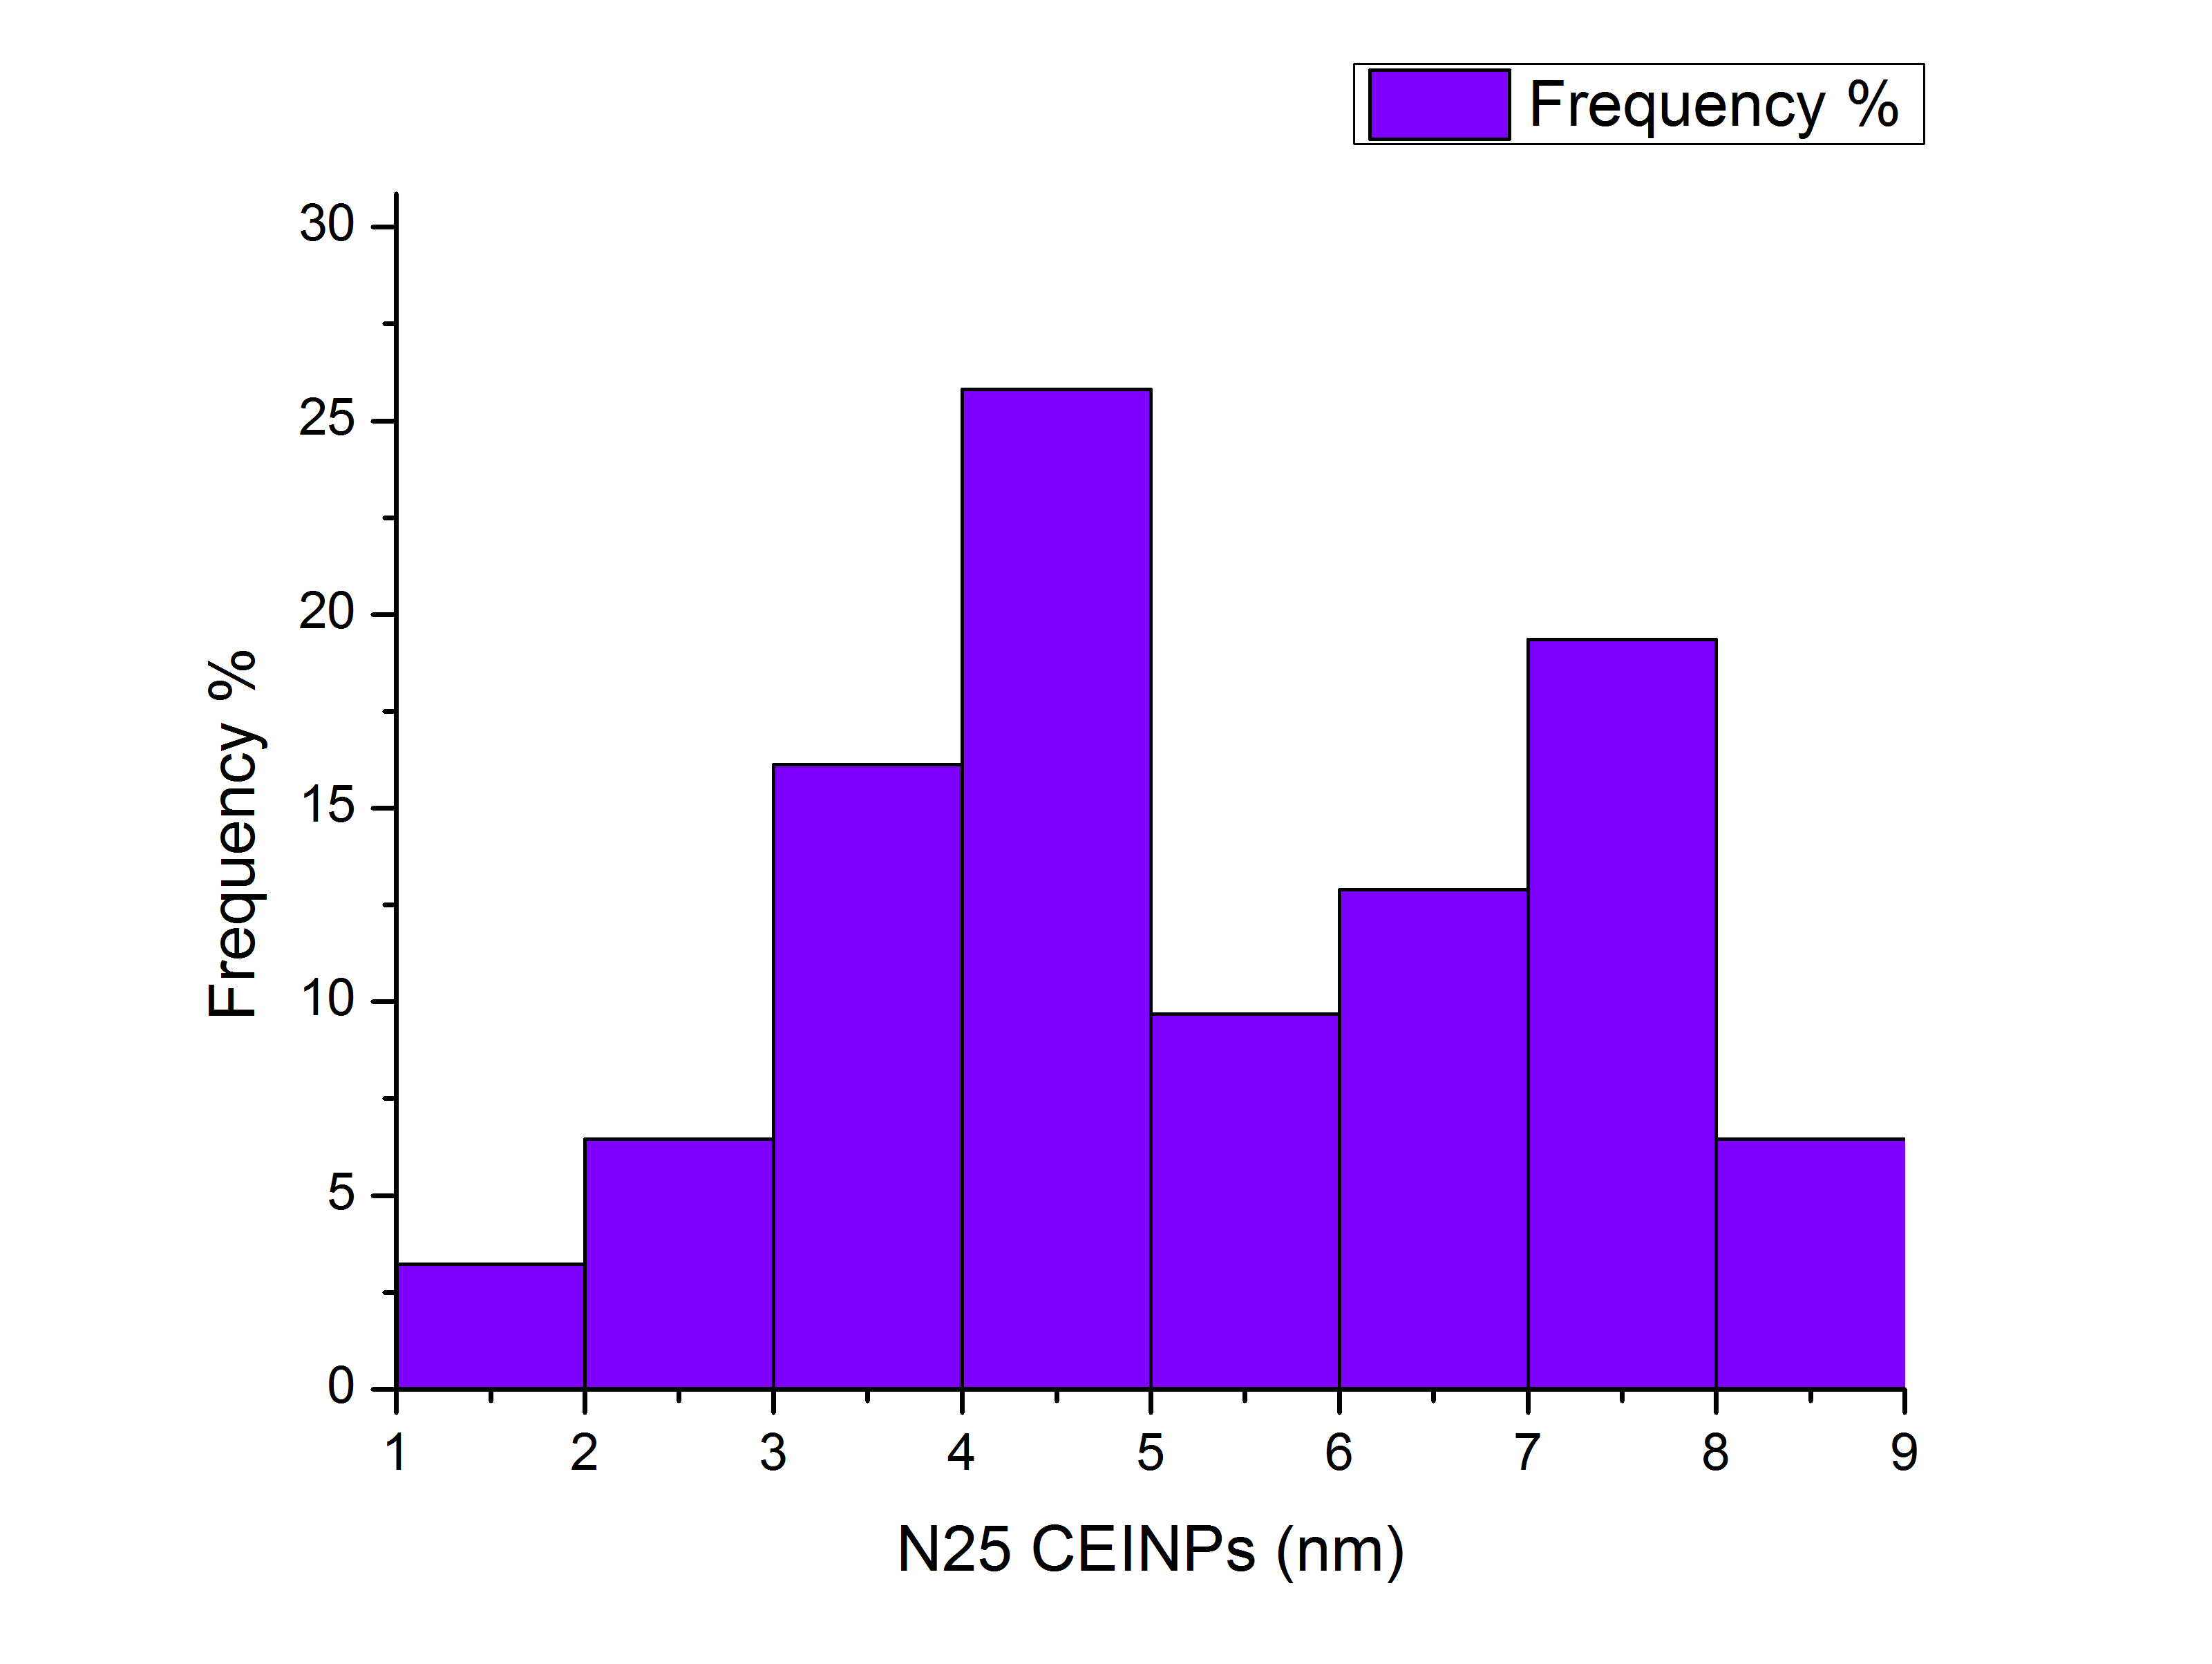


(b)


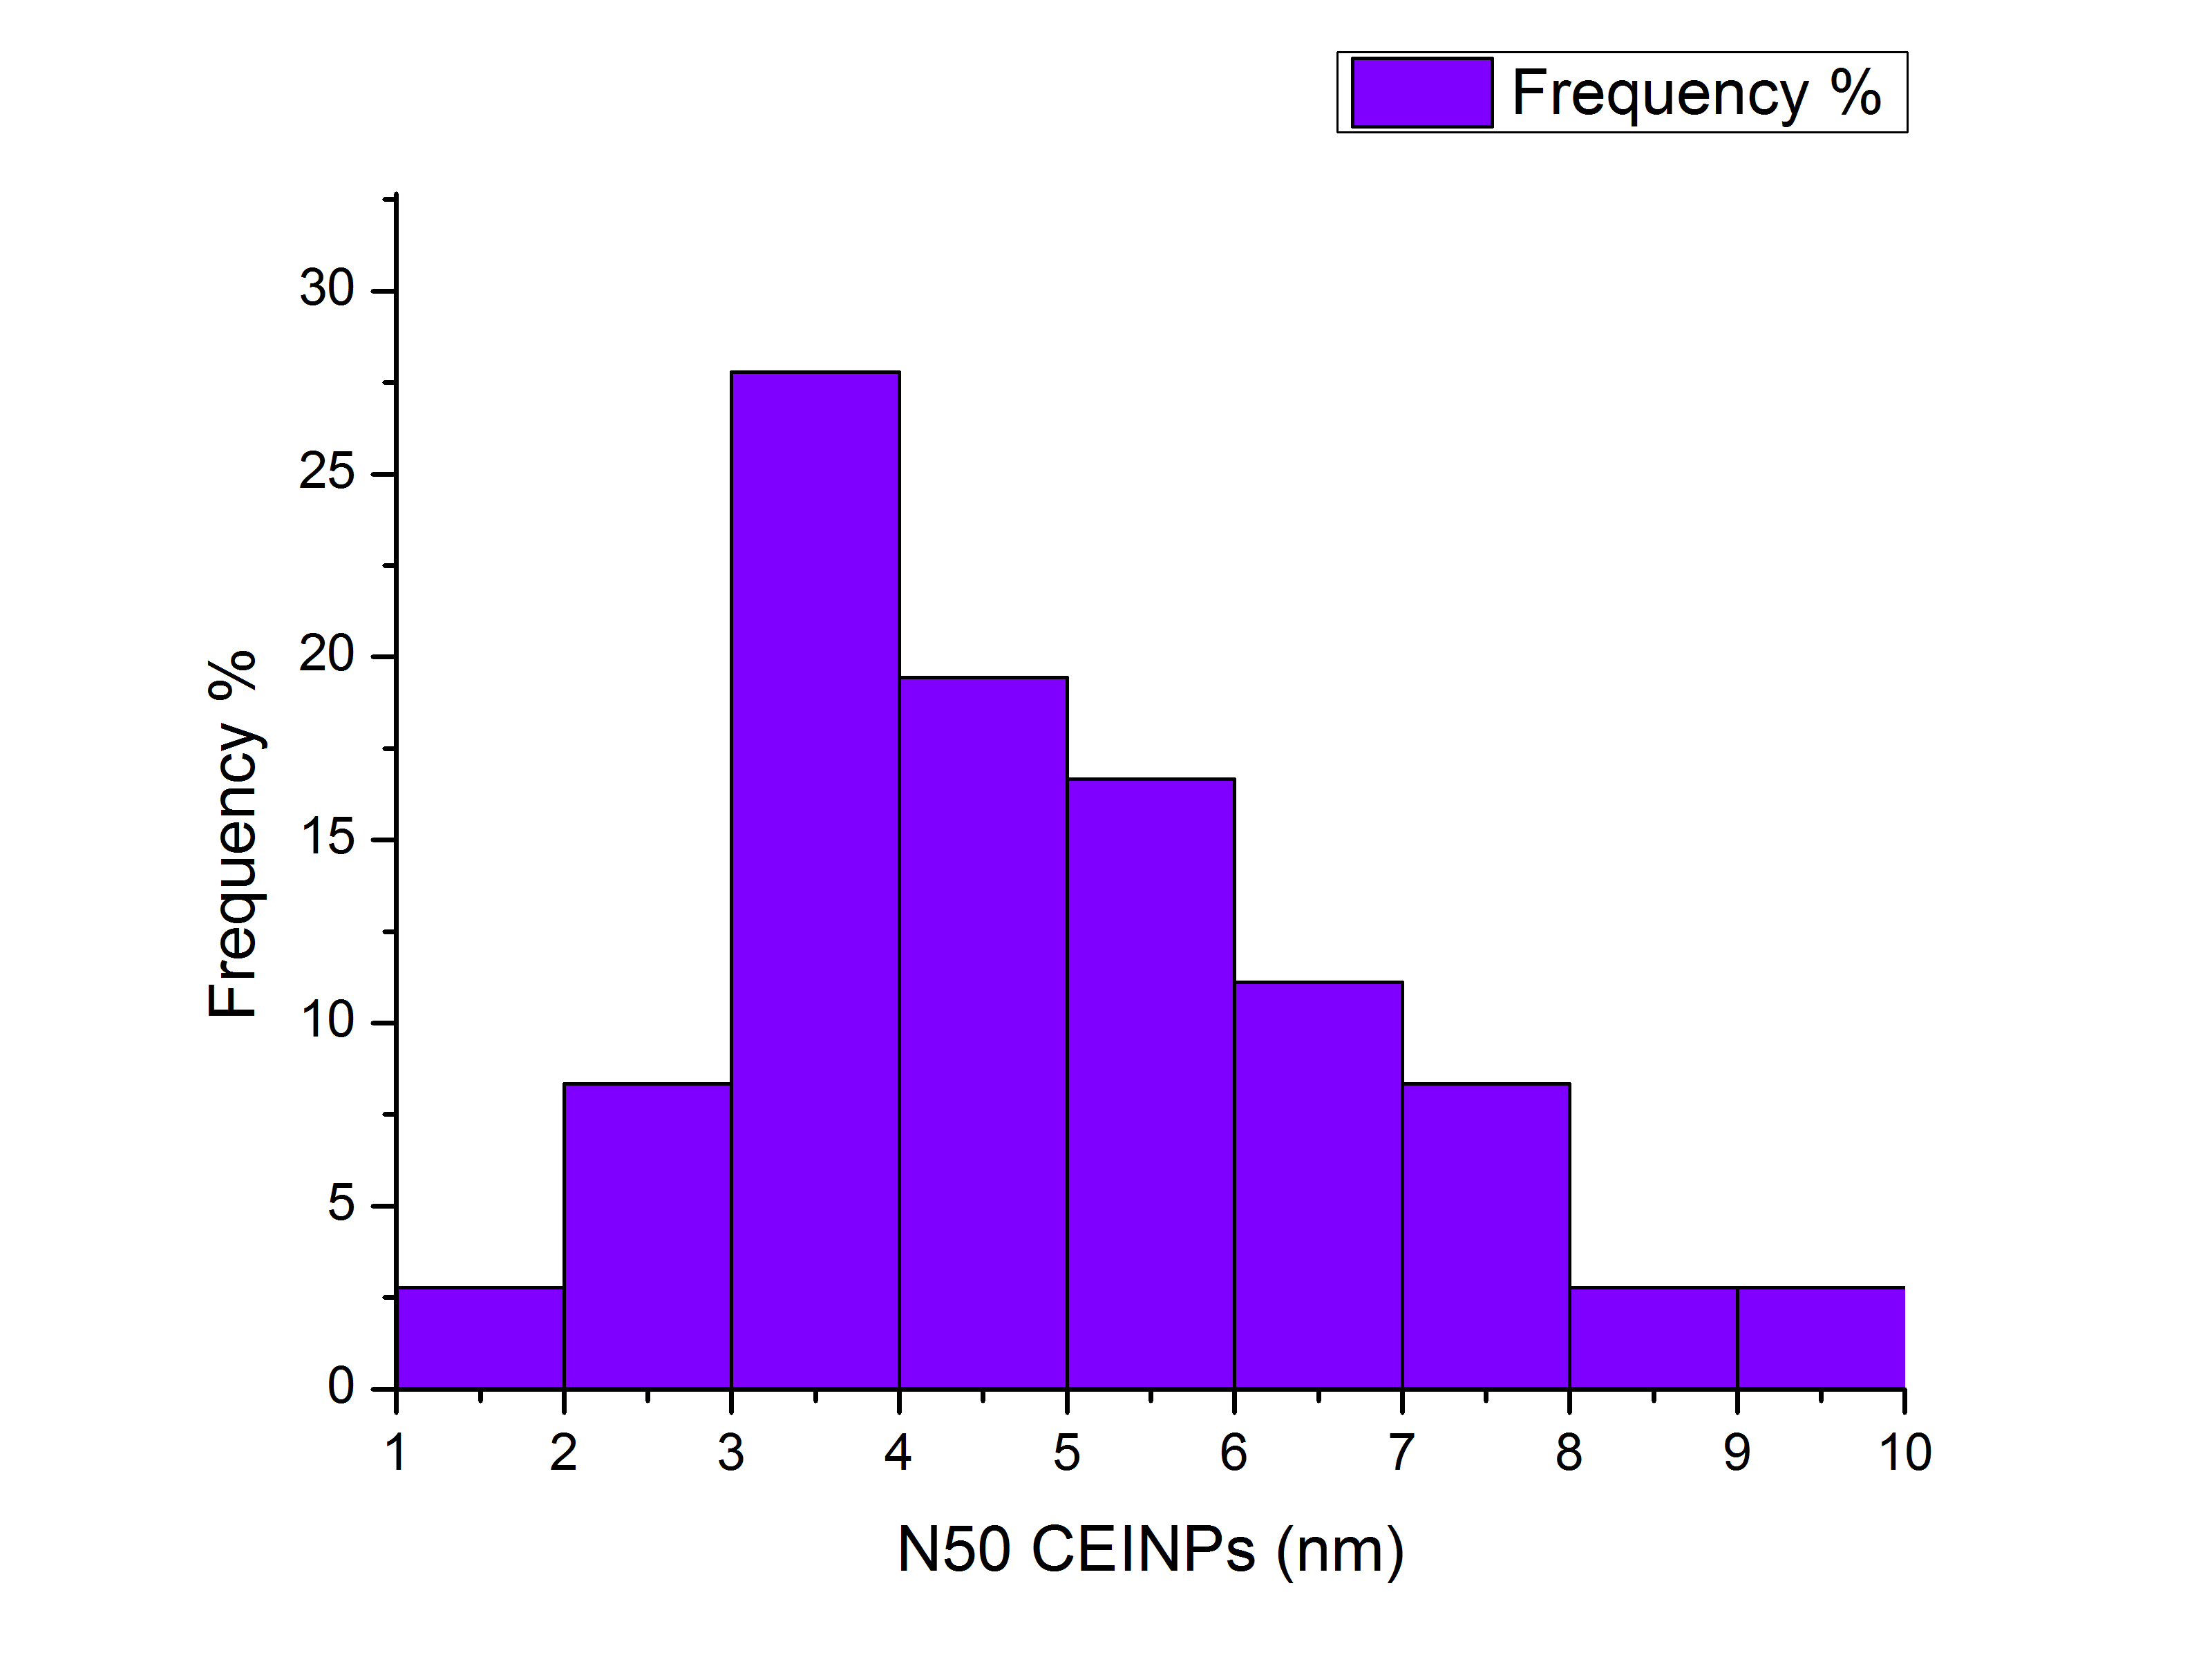


(c)


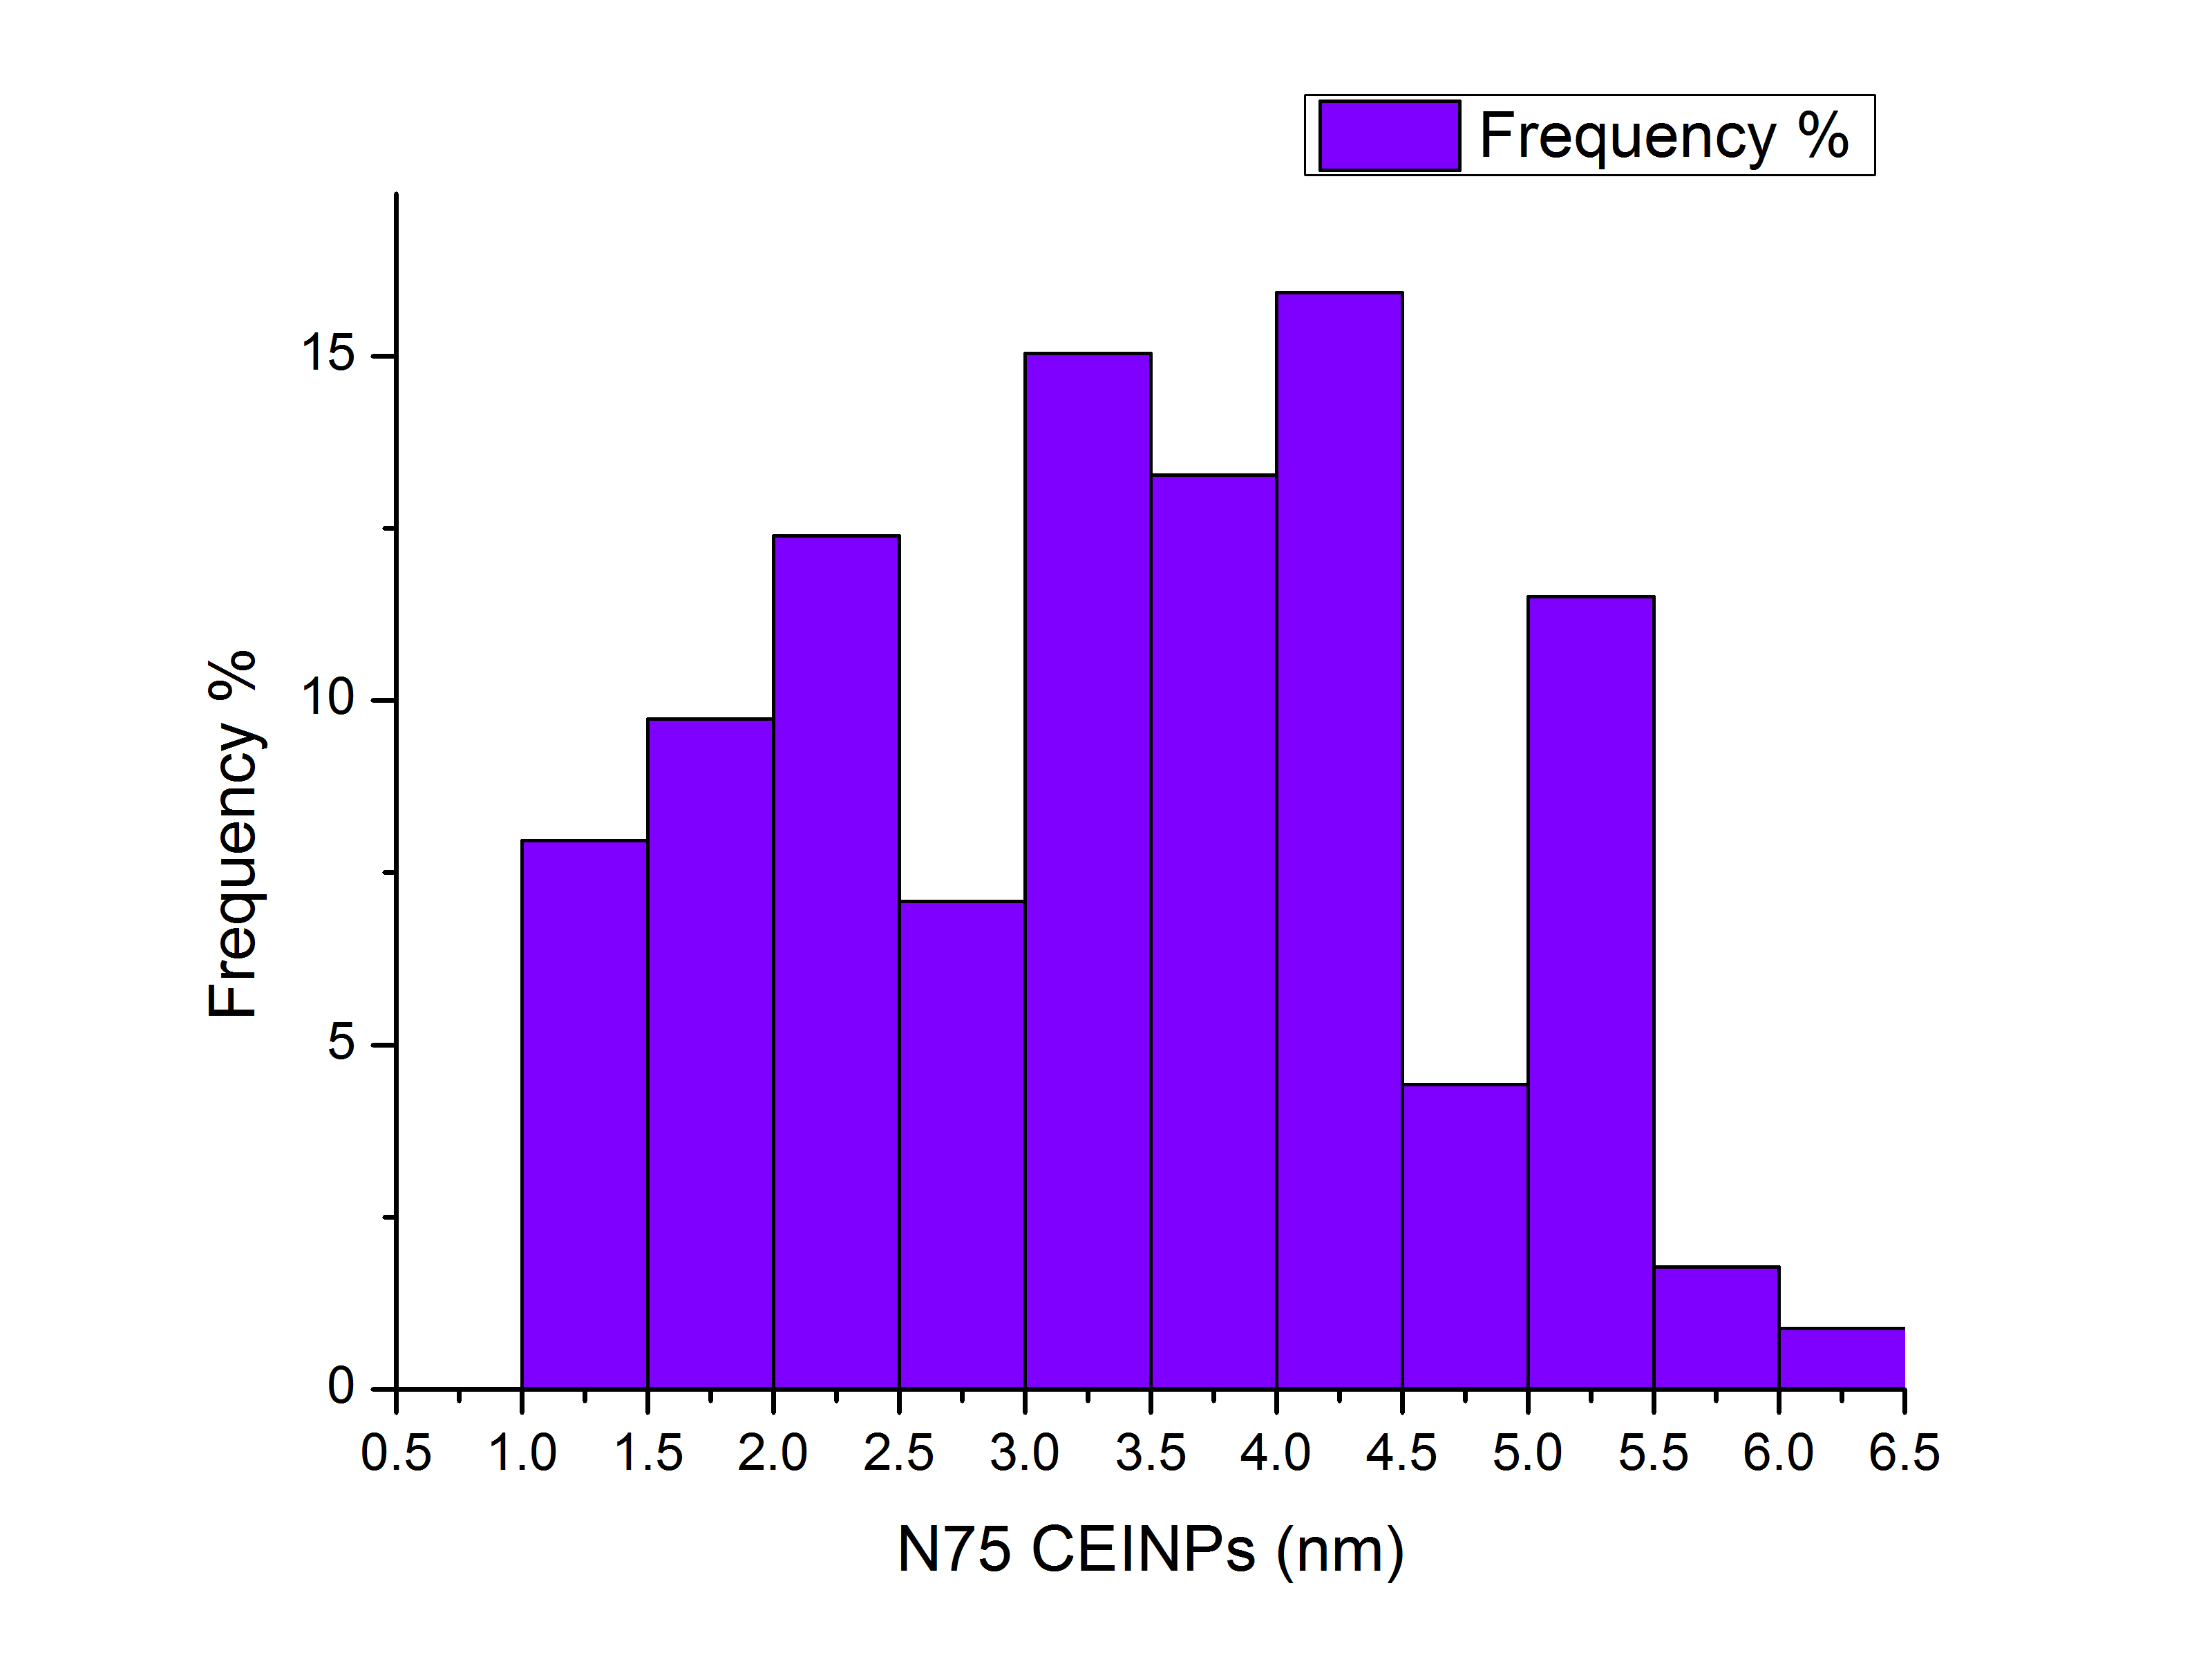


(d)


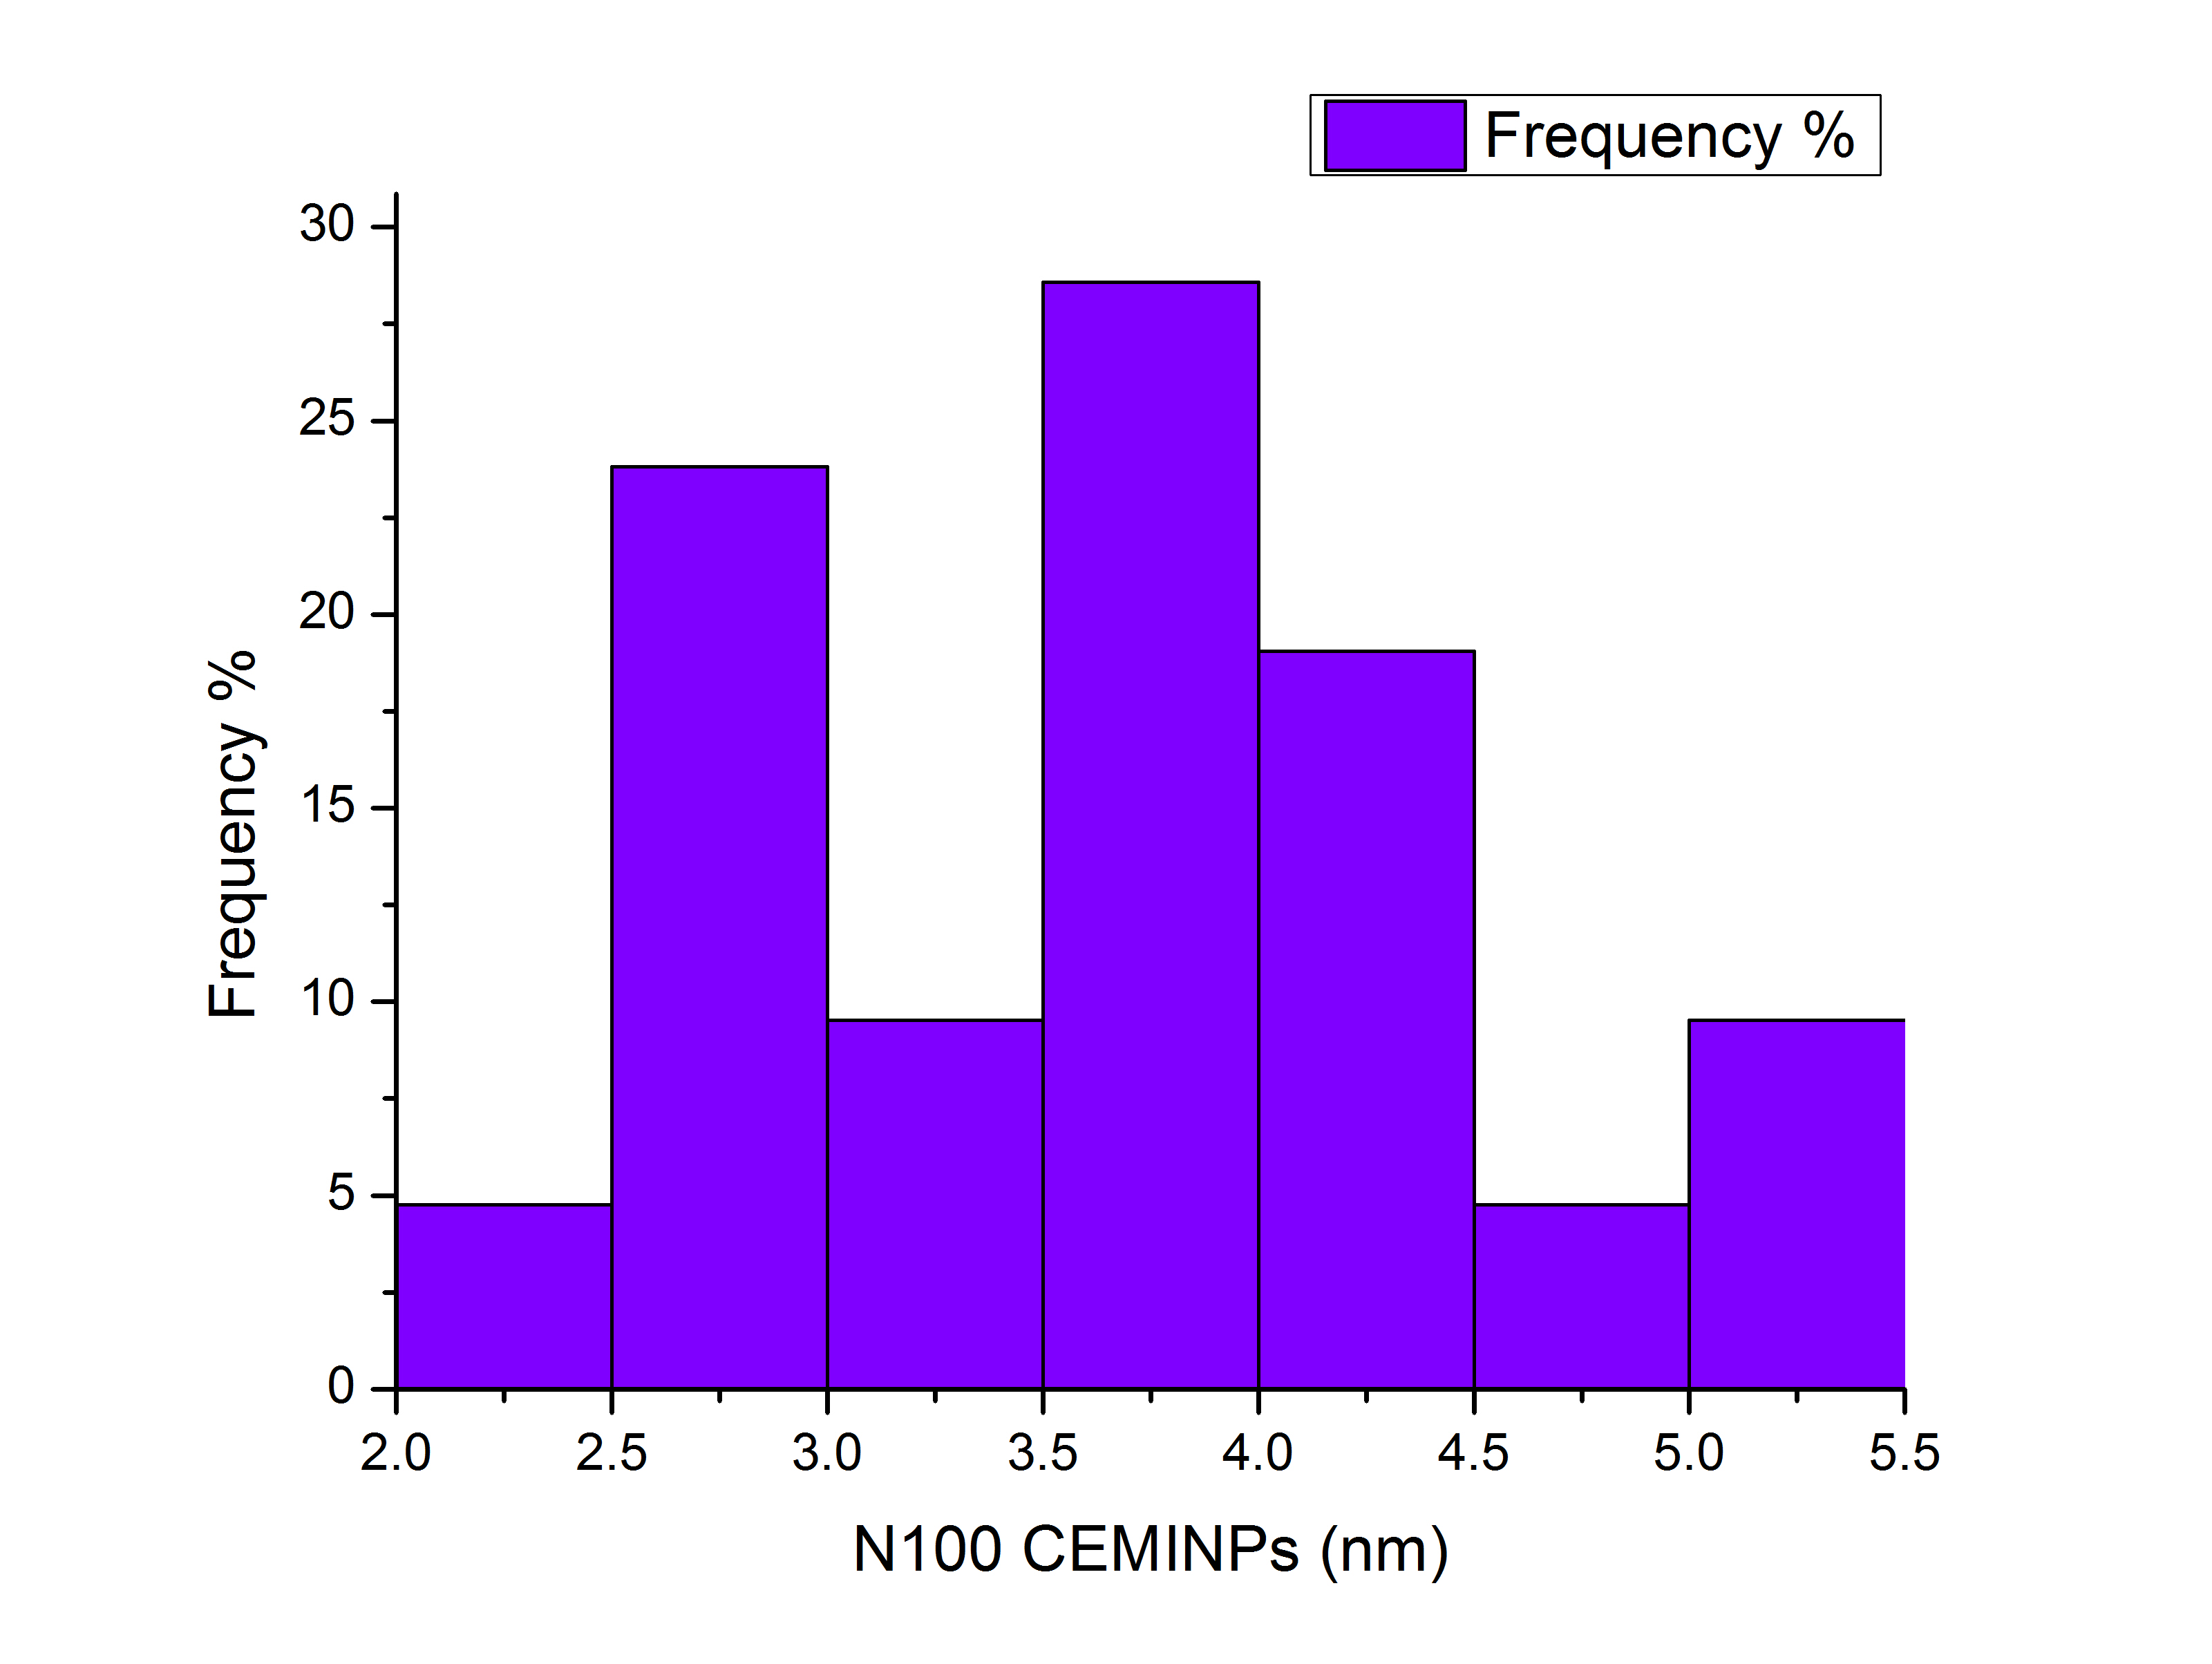


(e)

Figure S2. Iron core size distribution for all samples. (a) Iron cores of N0 sample show narrow size distribution and followed the lognormal curve. (b) In case of N25 sample, there are two size categories of nanoparticles from 1-6 and 6 to 9. (c) and (d) N50 and N75 do not show narrow size distribution due to the deformation of carbon electrode and its influence on plasma formation in terms of size and stability. (e) N100 (CEMINPs) size distribution estimation is quiet broad due to the appearance of different iron core sizes in each carbon shell.
